# Supplementary material for: Four 2D Ln–Cd heterometal–organic coordination polymers based on tetranuclear Ln–Cd oxo-cluster with highly selective luminescent sensing of organic molecules and metal cations
Source: Royal Society of Chemistry journal article supplement (doi:10.1039/c4ra02953d), 2014-01-01
Supplement: c4ra02953d1.pdf [file c4ra02953d1.pdf]

# Four 2D Ln-Cd Heterometal-organic Coordination Polymers Based on Tetra-nuclear Ln-Cd Oxo-cluster with High Selective Luminescent Sensing of Organic Molecules and Metal Cations

Qi Liu,<sup>[a]</sup> Fang Wan,<sup>[a]</sup> Li-Xia Qiu,<sup>[a]</sup> Yan-Qiong Sun\*<sup>[a,b]</sup> and Yi-Ping Chen<sup>[a]</sup>

[a] Department of Chemistry, Fuzhou University, Fuzhou, Fujian 350108, People's Republic of China.  
Fax: +86-591- 22866340  
E-mail: [sunyq@fzu.edu.cn](mailto:sunyq@fzu.edu.cn)

[b] State Key Laboratory of Structural Chemistry, Fujian Institute of Research on the Structure of Matter, Chinese Academy of Sciences, Fuzhou, Fujian 350002, PR China

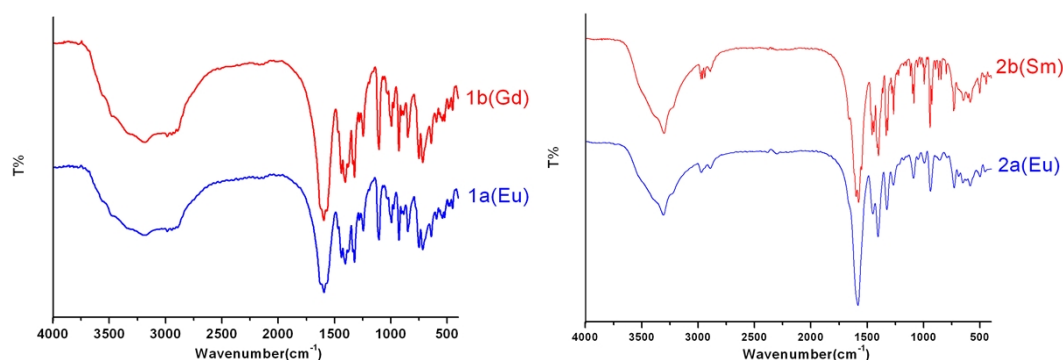

Fig. S1 IR spectra of **1a**, **1b**, **2a** and **2b**.

The similar IR spectral shapes of **1a** and **1b**, **2a** and **2b** suggest that **1a** and **1b**, **2a** and **2b** are isostructural, respectively. The broad bands at 3700-2800 cm<sup>-1</sup> for **1a** and **1b** and 3700-2900 cm<sup>-1</sup> for **2a** and **2b** correspond to the stretching bands of O-H of water molecules. The band at 1595 cm<sup>-1</sup> for **1a** and **1b** and 1580 cm<sup>-1</sup> for **2a** and **2b** corresponds to the stretching bands of C=O of COO<sup>-</sup>. The red shift of the bands indicates the coordination between the cations and carboxylate radicals of DTPA<sup>5-</sup>.

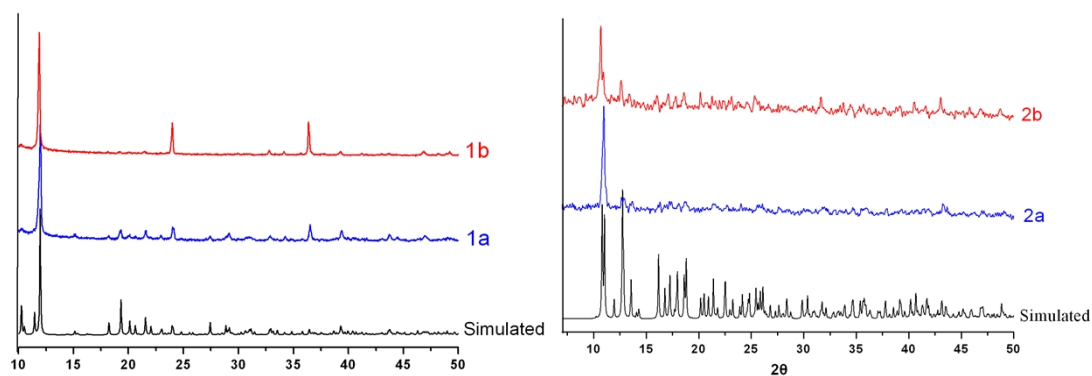

Fig. S2 The PXRD pattern of **1a**, **1b**, **2a**, **2b** and simulated respectively.

The PXRD patterns of **1** and **2** are very close to each other, which coincide with simulated, indicating the purity of the crystals.

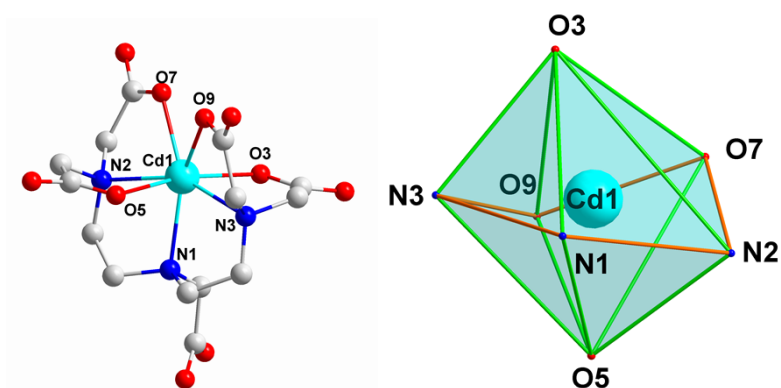

**Fig. S3** The coordination environments of Cd atom in **1a**. (left) The ball-stick representation. (right) The polyhedral representation.

The coordination geometry for the two seven-coordinate  $\text{Cd}^{2+}$  ions in **1a** is close to a monocapped trigonal prism: three N atoms and four O atoms are from one  $\text{DTPA}^{5-}$  anion.

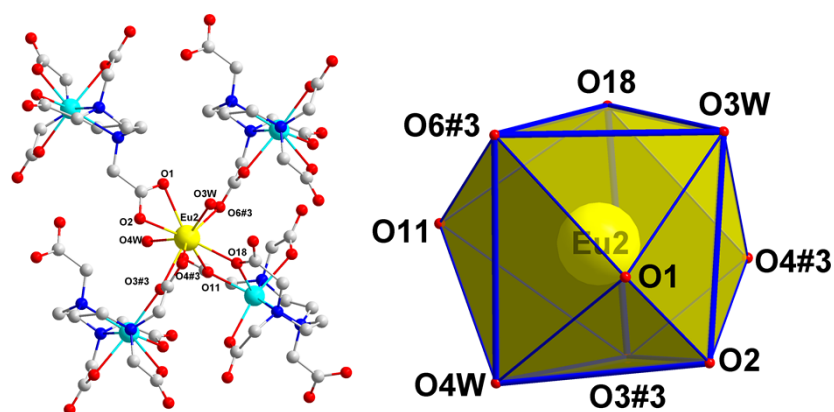

**Fig. S4** The coordination environments of Eu atom in **1a**. (left) The ball-stick representation. (right) The polyhedral representation. Symmetry codes: #3, 1-x, 1-y, 1-z.

The  $\text{Eu}^{3+}$  ions in **1a** is nine-coordinated and described as a tricapped trigonal prism with seven O atoms from four  $\text{DTPA}^{5-}$  anions and two other coordinated water molecules.

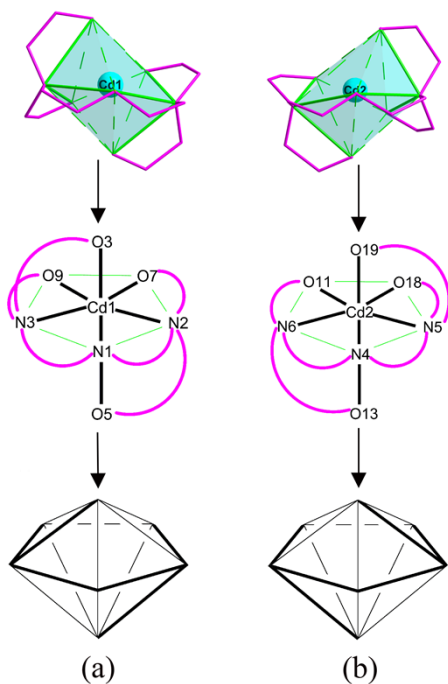

**Fig. S5.** Two forms of coordination modes of two  $\text{DTPA}^{5-}$  anions in the asymmetrical unit of **Type I**. (a) Mode  $\alpha$ , (b) Mode  $\beta$ .

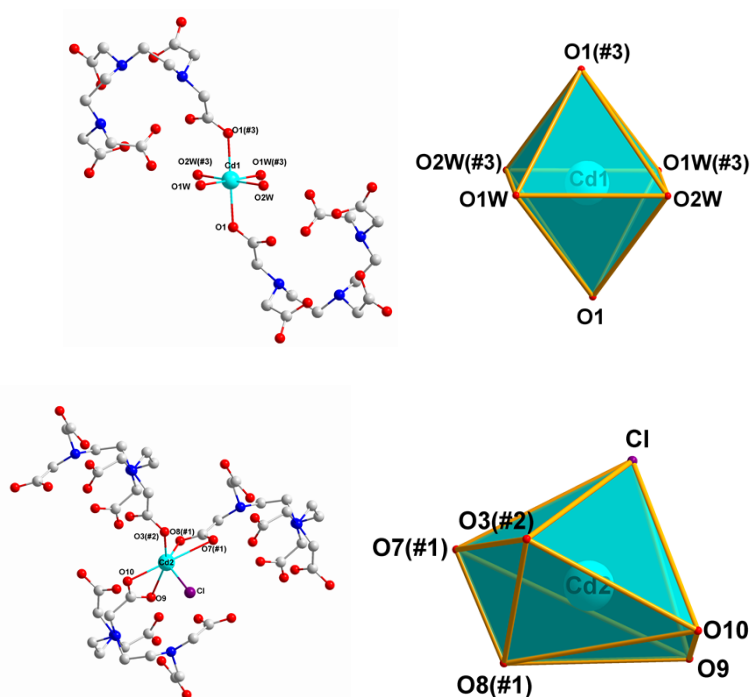

**Fig. S6** The coordination environments of Cd atoms in **2a**. (left) The ball-stick representations. (right) The polyhedral representations. Symmetry codes: #1, -x, -y, -z. #2, -x, 1-y, -z. #3, -x, -y, 1-z

The coordination geometries for Cd1 and Cd2 of **2a** are both octahedron (Figure S3). Cd1 locates at a symcenter coordinates to two  $\text{O}_{\text{COO}^-}$  atoms and four coordinated water molecules. While Cd2 coordinates to five  $\text{O}_{\text{COO}^-}$  atoms from three  $\text{DTPA}^{5-}$  anions and one  $\text{Cl}^-$  anion.

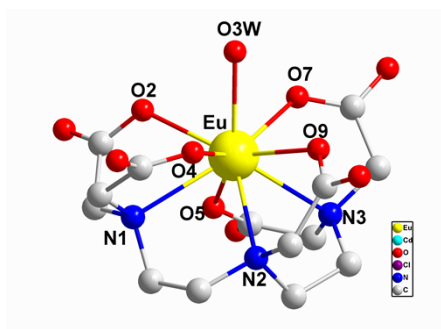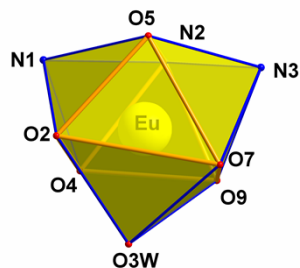

**Fig. S7** The coordination environments of Eu atom in **2a**. (left) The ball-stick representation. (right) The polyhedral representation.

The  $\text{Eu}^{3+}$  ions in the structure of **2a** are chelated by one  $\text{DTPA}^{5-}$  anion, and the last coordinated point is occupied by one coordinated water molecule forming a tricapped trigonal prism.

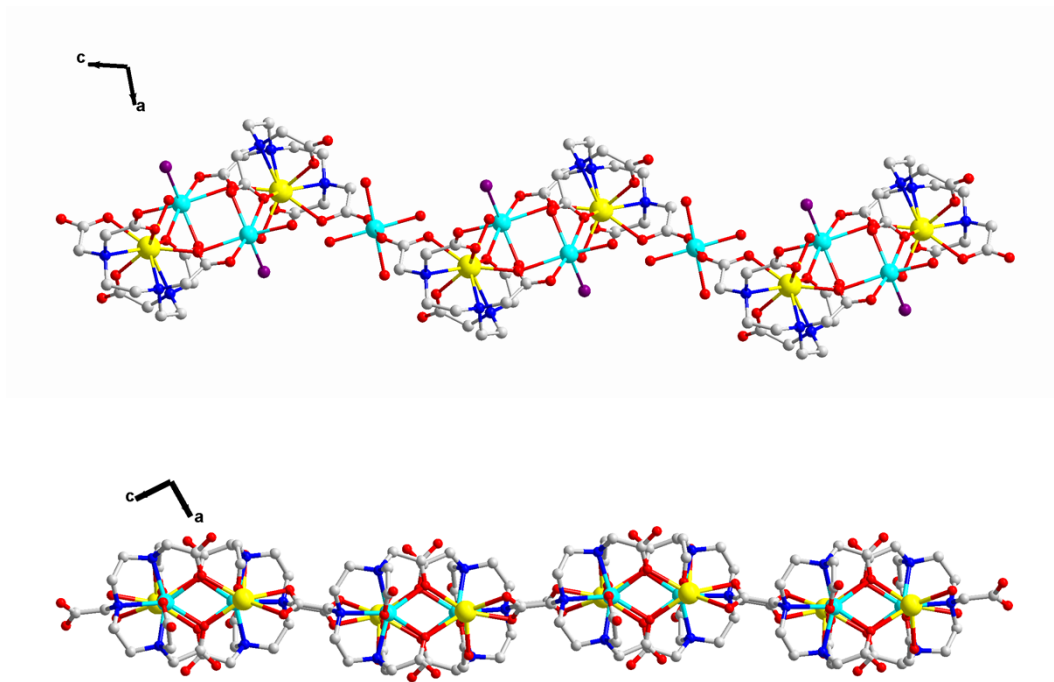

**Fig. S8** The 2D layer in the structures of **1a** (up) and **2a** (down).

The 2D layer in compound **2a** is like wave while it is mostly a plane of 2D layer in compound **1a**.

**Table S1** Selected hydrogen bonds for **1a**

| D–A···A          | d(D–H) (Å) | d(H···A) (Å) | d(D···A)(Å) | <DHA(°) |
|------------------|------------|--------------|-------------|---------|
| O2W–H2WB···O7W#3 | 0.903      | 2.134        | 2.787       | 128.47  |
| O4W–H4WB···O6W#3 | 0.851      | 1.901        | 2.751       | 177.71  |
| O6W–H6WA···O12#4 | 0.850      | 1.994        | 2.843       | 176.50  |
| O6W–H6WB···O2    | 0.850      | 1.925        | 2.773       | 175.65  |
| O7W–H7WA···O10#3 | 0.850      | 2.615        | 3.206       | 127.67  |
| O7W–H7WB···O15#4 | 0.850      | 1.990        | 2.821       | 165.47  |

Symmetry codes: #3, -x+1, -y+1, -z+1; #4, x-1, y, z+1

**Table S2** Selected hydrogen bonds for **2a**

| D–A···A         | d(D–H) (Å) | d(H···A) (Å) | d(D···A)(Å) | <DHA(°) |
|-----------------|------------|--------------|-------------|---------|
| O1W–H1WA···O6#3 | 0.875      | 2.205        | 2.748       | 119.92  |
| O1W–H1WA···O6   | 0.875      | 2.015        | 2.741       | 139.74  |

Symmetry codes: #3, -x, -y, -z+1

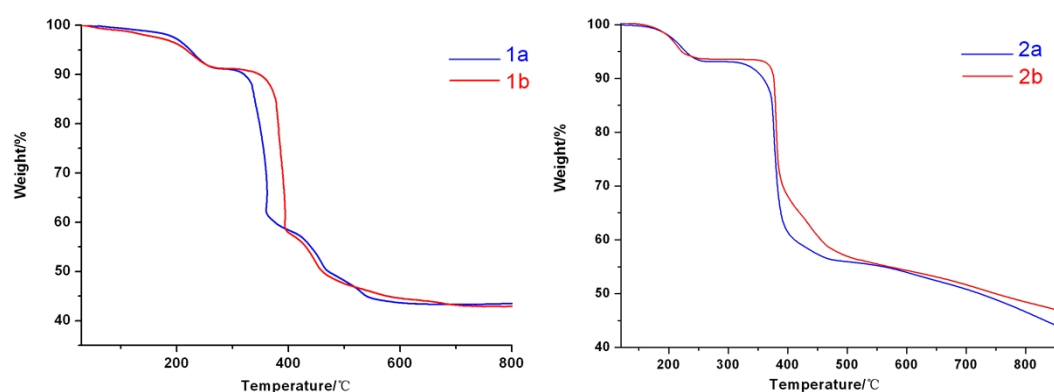**Fig. S9** TGA of **1a**, **1b**, **2a** and **2b**.

The thermal stability of **1a** and **1b**, **2a** and **2b** were examined by the TGA analysis in dry air atmosphere. In the TGA curve of **1a** and **1b**, the weight loss of 9.30% (calcd: 9.93%) for **1a**, 9.30% (calcd: 9.86%) for **1b** in the temperature range 30-310 °C, corresponding to the successive release of all coordinated and free water molecules. The decomposition of H<sub>5</sub>DTPA is observed from 310 °C to 800 °C. The residue might be Eu<sub>2</sub>O<sub>3</sub>·2CdO (calcd/found: 42.00%/43.47%) for **1a**,

$\text{Gd}_2\text{O}_3 \cdot 2\text{CdO}$  (calcd/found: 42.42%/42.87%) for **1b**. Similarly, in the TGA curve of **2a** and **2b**, the weight loss of 6.73% (calcd: 6.76%) for **2a**, 6.33 (calcd: 6.78%) for **2b**, in the temperature range 50-255 °C, corresponding to the successive release of 6 coordinated water molecules. The decomposition of  $\text{H}_3\text{DTPA}$ ,  $\text{HCl}$  is observed from 255 °C to 800 °C. The residue might be  $\text{Eu}_2\text{O}_3 \cdot 3\text{CdO}$  (calcd/found: 46.17%/46.60%) for **2a**,  $\text{Sm}_2\text{O}_3 \cdot 3\text{CdO}$  (calcd/found: 46.06%/48.42%) for **2b**.

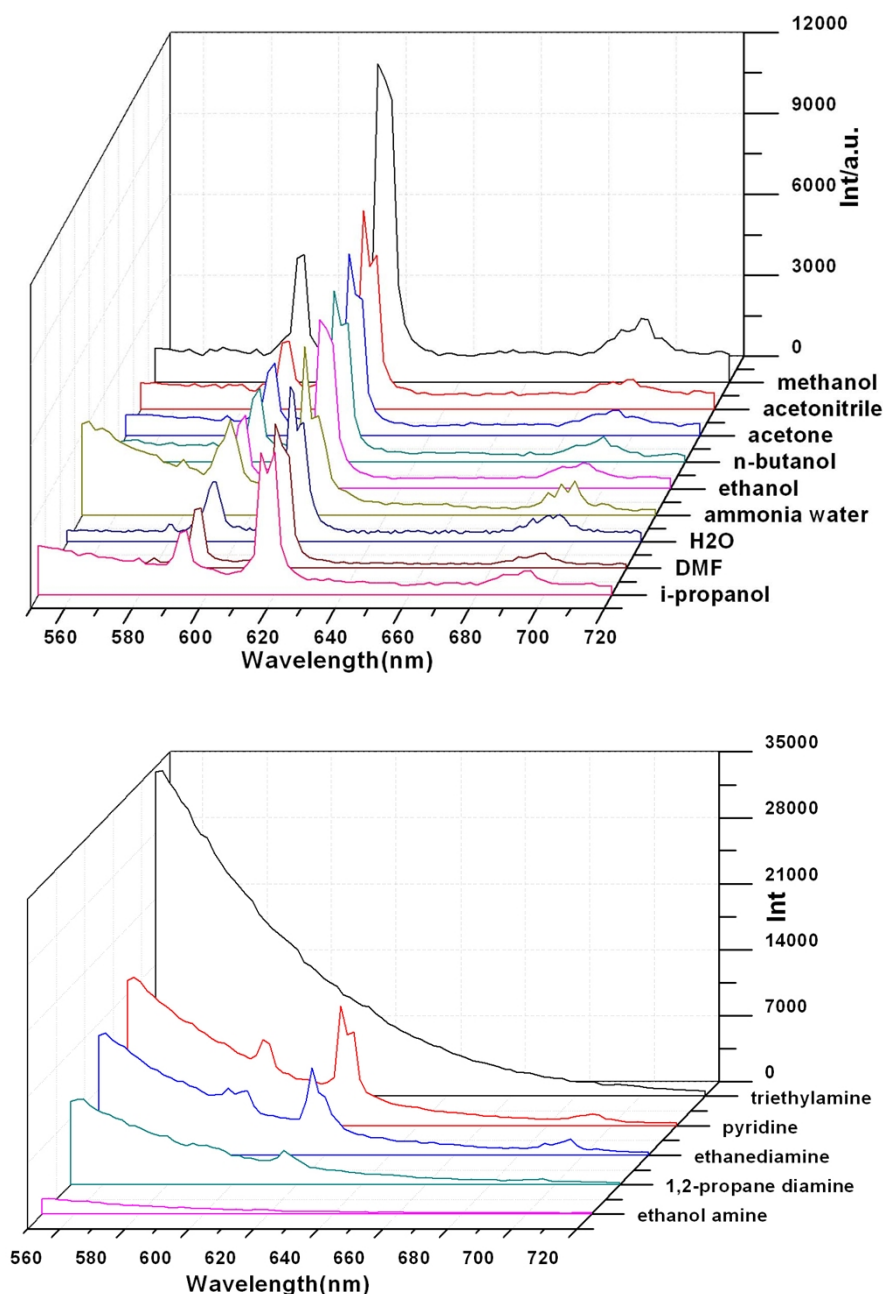

**Fig. S10.** Emission spectra of **1a** in different solvents.

As for acetonitrile, acetone, n-butanol, ethanol, ammonia water,  $\text{H}_2\text{O}$ , DMF, i-propanol, the luminescence spectra do not show too much difference from each other. But for solvents like triethylamine, pyridine, ethanediamine, 1,2-propane diamine, ethanol amine, the emission of **1a** were covered by emissions of these nitrogenous compounds. Especially in triethylamine and ethanol amine, emission of  $\text{Eu}^{3+}$  were completely quenching of the luminescence intensity. These

results suggest that **1a** could be a promising luminescent probe for methanol, triethylamine and ethanol amine.

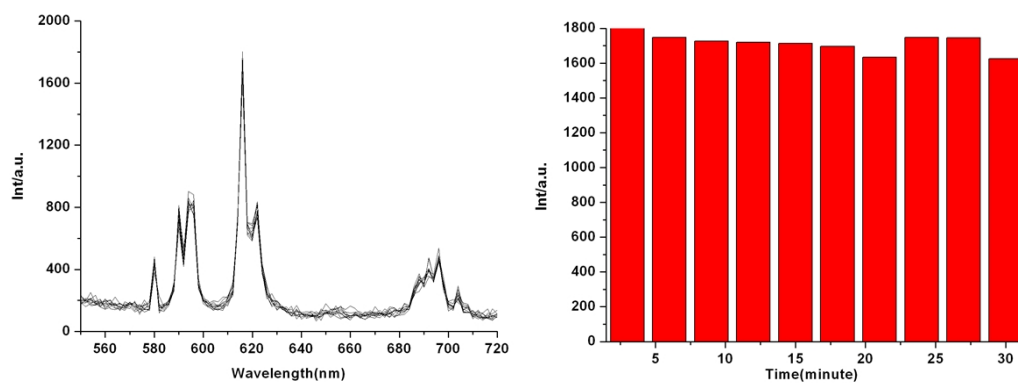

**Fig. S11** (left) The luminescence spectra of **1a** in aqueous solution throughout the measure ( $\lambda_{\text{ex}} = 395$  nm) in 30min. (right) The emission intensity of  $^5D_0-^7F_2$  (616nm) transition versus time.

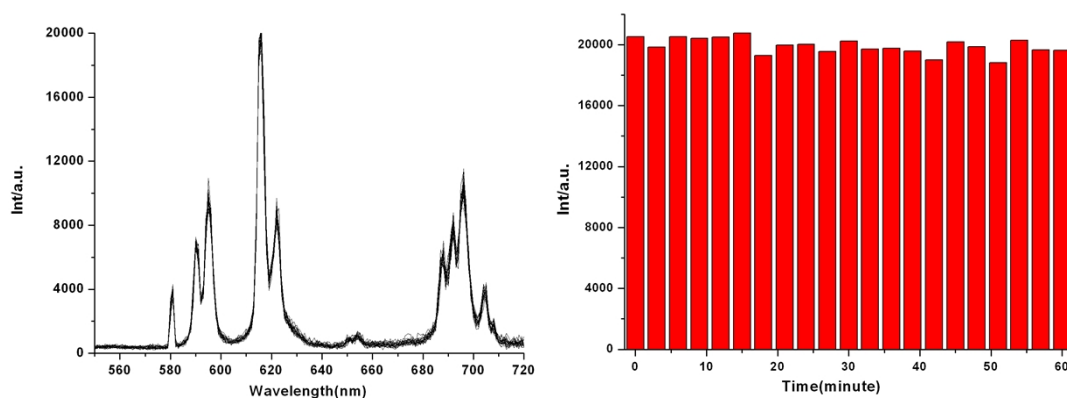

**Fig. S12** (left) The luminescence spectra of **2a** in aqueous solution throughout the measure ( $\lambda_{\text{ex}} = 395$  nm) in 30min. (right) The emission intensity of  $^5D_0-^7F_2$  (616nm) transition versus time.

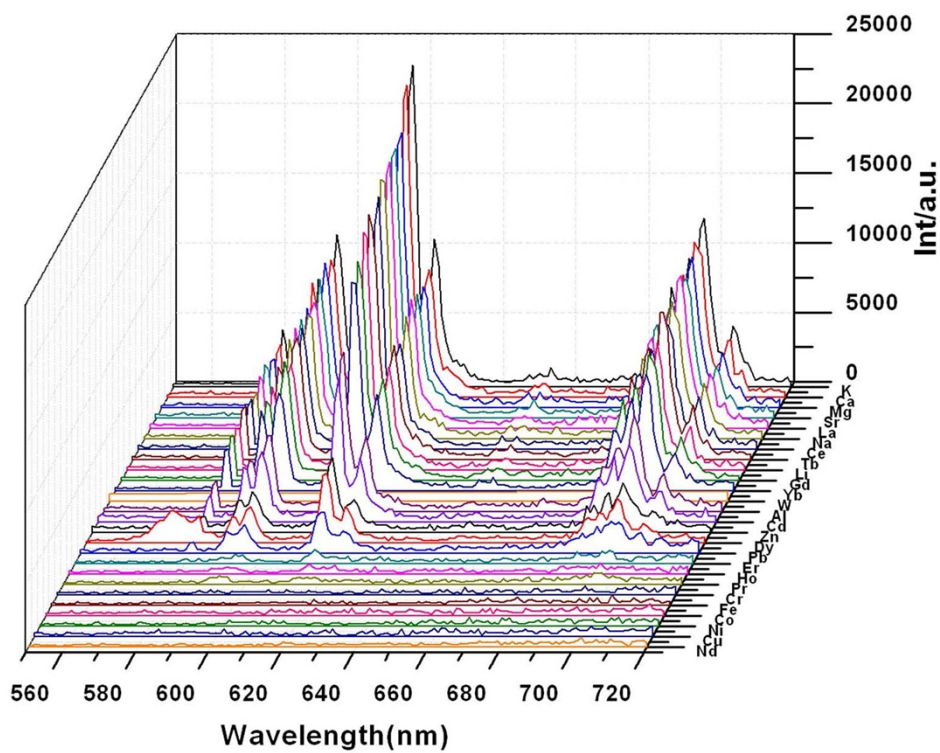

(a)

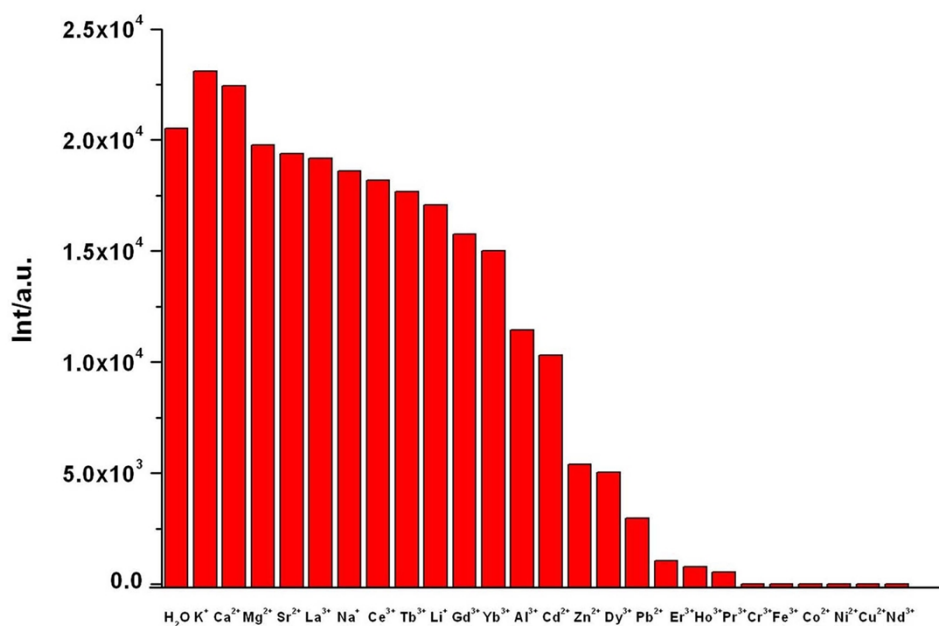

(b)

Fig. S13. (a) Emission spectra of **2a** (excitation at 395 nm) and (b) the  $^5D_0 \rightarrow ^7F_2$  transition intensities of **2a** dispersed into different aqueous solution containing different 0.1M  $M(NO_3)_x$ .



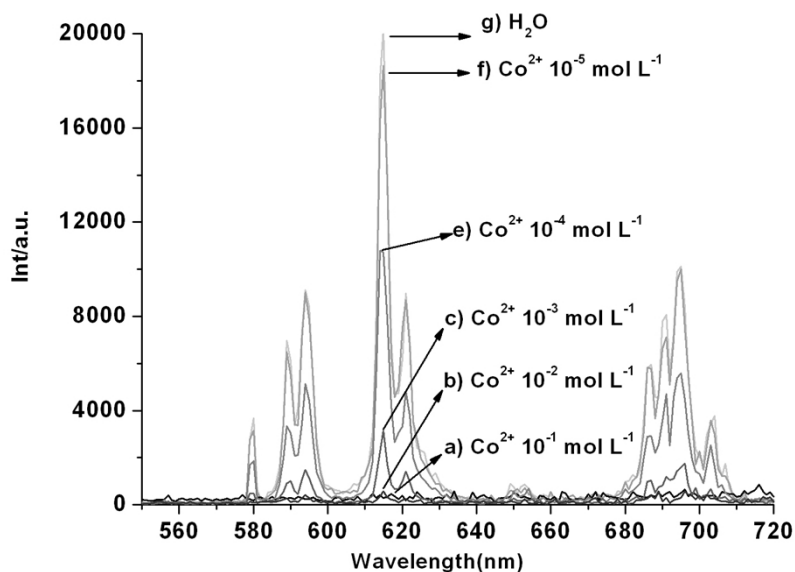

**Fig. S14.** The emission spectra of **2a** in DMA solutions with  $\text{Co}(\text{NO}_3)_2$  at different concentrations (excited at 395 nm).

The luminescence intensity of **2a** is almost completely quenched at a  $\text{Co}(\text{NO}_3)_2$  concentration of  $10^{-2} \text{ mol L}^{-1}$ .

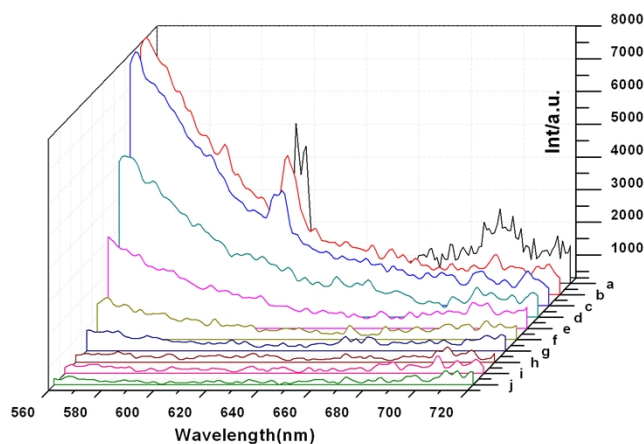

**Fig. S15** Emission spectra of 5mg **1a** ( $\lambda_{\text{ex}} = 395 \text{ nm}$ ) in 5 ML mixed solvents with different concentrations ( $V_{\text{H}_2\text{O}}:V_{\text{ethanol amine}} = 5.0:0.0$ (a), 4.5:0.5(b), 4.0:1.0(c), 3.5:1.5(d), 3.0:2.0(e), 2.5:2.5(f), 2.0:3.0(g), 1.5:3.5(h), 1.0:4.0(i), 0.5:4.5(j)).

Mixed solvent system of water and ethanol amine was investigated. As shown in the Fig. 1 below. Luminescent spectra of 5 ML mixed solvents with different concentrations ( $V_{\text{H}_2\text{O}}:V_{\text{ethanol amine}} = 5.0:0.0, 4.5:0.5, 4.0:1.0, 3.5:1.5, 3.0:2.0, 2.5:2.5, 2.0:3.0, 1.5:3.5, 1.0:4.0, 0.5:4.5$ ) contain 5mg compound **1a** were measured. When  $V_{\text{H}_2\text{O}}:V_{\text{ethanol amine}} = 3.5:1.5, 3.0:2.0, 2.5:2.5, 2.0:3.0, 1.5:3.5, 1.0:4.0, 0.5:4.5$ , the luminescence of compound **1a** were quenched.
